# Supplementary material
Source: PubMed Central journal article supplement (PMC2761647)
Supplement: NIHMS133124-supplement-Supplementary_Table_Crosier_VKCORGGCX.pdf [file NIHMS133124-supplement-Supplementary_Table_Crosier_VKCORGGCX.pdf]

## Supplemental

| SNP                                                                             | Primers or ABI assay on Demand ID                          | Probe                                                            |
|---------------------------------------------------------------------------------|------------------------------------------------------------|------------------------------------------------------------------|
| <i>VKORC1</i><br><i>rs1787854</i><br>4                                          | F: TCCATCTGCAACCTTAATTCCCTTT<br>R: TGCATGAATCCCTGGAACCTTGT | CCATTTAACCT[A/G]TCATA<br>TTC                                     |
| <i>VKORC1</i><br><i>rs8050894</i>                                               | ABI C__2847860_10; Reverse strand                          | CCACATCCCCACCCGCAGG<br>ACGCTC[G/C]GTGATGAGCA<br>GCTAGCTGGCTGTCA  |
| <i>VKORC1</i><br><i>rs7294</i>                                                  | F: GGCATATCTGGGTCCTAGAAG<br>R: GTGTGGCACATTTGGTCCATT       | CATACCC[A/G]CACATGAC                                             |
| <i>GGCX</i><br><i>rs1018742</i>                                                 | ABI C__11504816_10; Reverse strand                         | GAAGACCCCAGGAGTTTCT<br>AGGCCA[C/T]CCACCGAGA<br>ACTATTGTCCTAAAGG  |
| <i>GGCX</i><br><i>rs7568458</i>                                                 | ABI C__25474505_10; Reverse strand                         | CTCCACCTCAAATCAAAGA<br>AATCAC[A/T]GCACCAACA<br>GCTCAGAGCTTCCGCC  |
| <i>GGCX</i><br><i>rs699664</i>                                                  | ABI C__1036123_10; Reverse strand                          | GAGGGGCAACAGTTGTTGC<br>AACCTT[C/T]GGGGGCAGTA<br>GGACACCAGCTTCCG  |
| <i>GGCX</i><br><i>rs2028898</i>                                                 | ABI C__3225041_10; Reverse strand                          | GGAAGCTGAAAAACAGGA<br>AAAAGCC[A/G]ACCAAGTT<br>CAAACCTCCTGTTTCACC |
| 5ng DNA per 5µl reaction. 40 cycles (92°C denature 15s; 60°C anneal/extend 60s) |                                                            |                                                                  |
